# Supplementary material for: Superamphiphobic coatings with antifouling and nonflammable properties using functionalized hydroxyapatite
Source: Royal Society of Chemistry journal article supplement (doi:10.1039/d1nj00277e), 2021-01-01
Supplement: d1nj00277e1.pdf [file d1nj00277e1.pdf]

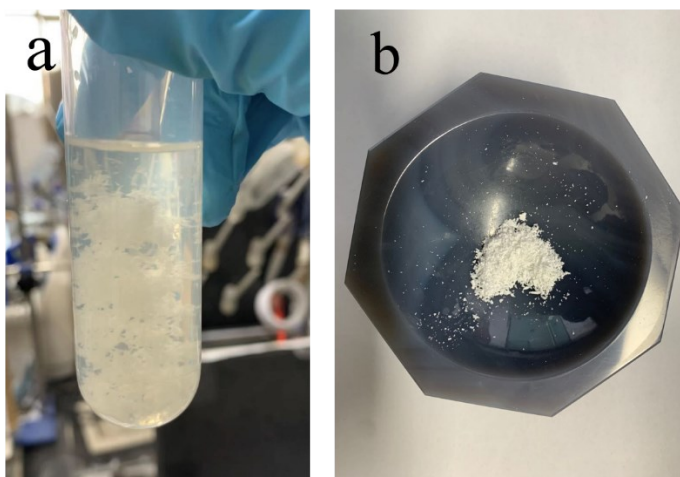

S1 (a) Physical map of flocculent HAP dispersed in ethanol. (b) After several times of washing, centrifugation, oscillation and drying, F-HAP-SiO<sub>2</sub> powder is obtained.

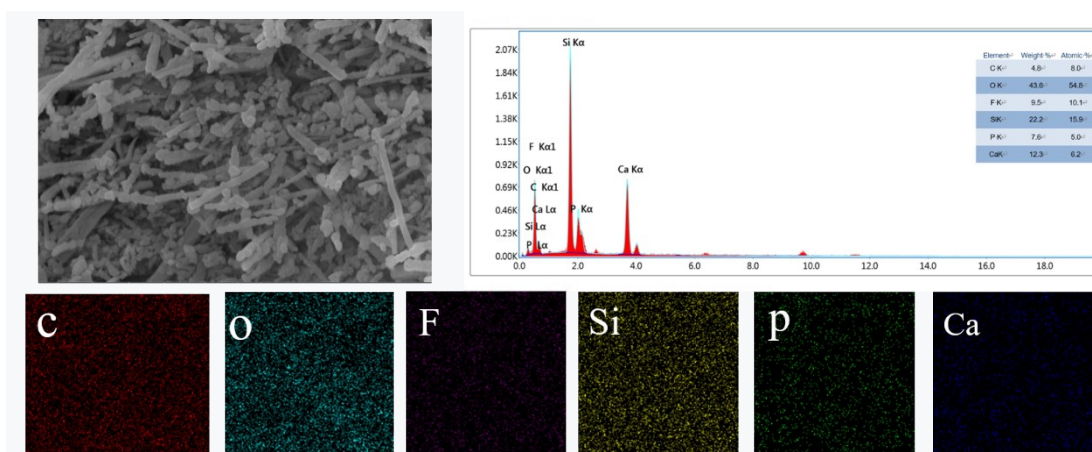

S2. FESEM-EDS mapping of the F-HAP-SiO<sub>2</sub>

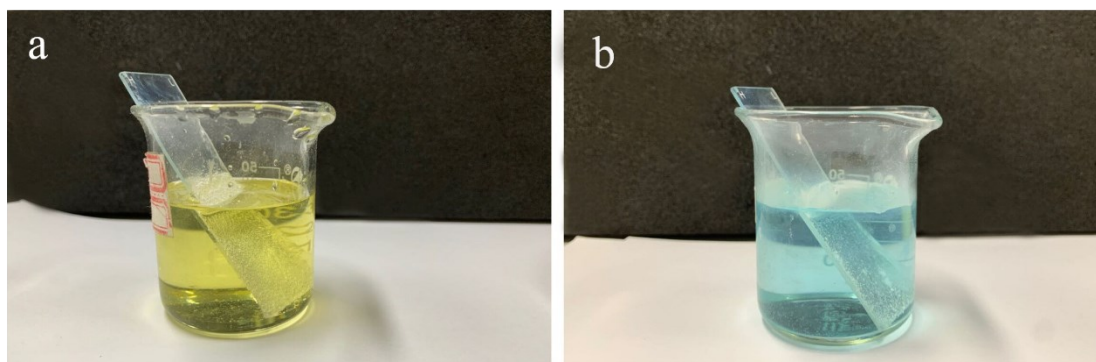

S3 Silver mirrorlike reflection phenomenon of the coated glass slides soaked in Rapeseed oil (a) and water (b)
